# Supplementary material for: Core/shell-structured, covalently bonded TiO2/poly(3,4-ethylenedioxythiophene) dispersions and their electrorheological response: the effect of anisotropy
Source: Royal Society of Chemistry journal article supplement (doi:10.1039/c5ra20284a), 2015-01-01
Supplement: c5ra20284a1.pdf [file c5ra20284a1.pdf]

### Electronic Supplementary Information

Core/shell structured covalently bonded TiO<sub>2</sub>/poly(3,4-ethylenedioxythiophene) dispersions and their electrorheological responses: Effect of anisotropy

*Ozlem Eroglu<sup>a,b</sup> and H. Ibrahim Unal<sup>\*,a</sup>*

<sup>a</sup>Gazi University, Chemistry Department, Smart Materials Research Lab., Ankara, Turkey

<sup>b</sup>National Nanotechnology Research Center-UNAM, Bilkent University, Ankara 06800, Turkey

\*Corresponding author. E-mail: hiunal@gazi.edu.tr.

Phone: +90-312-2021123. Fax: +90-312-2122279

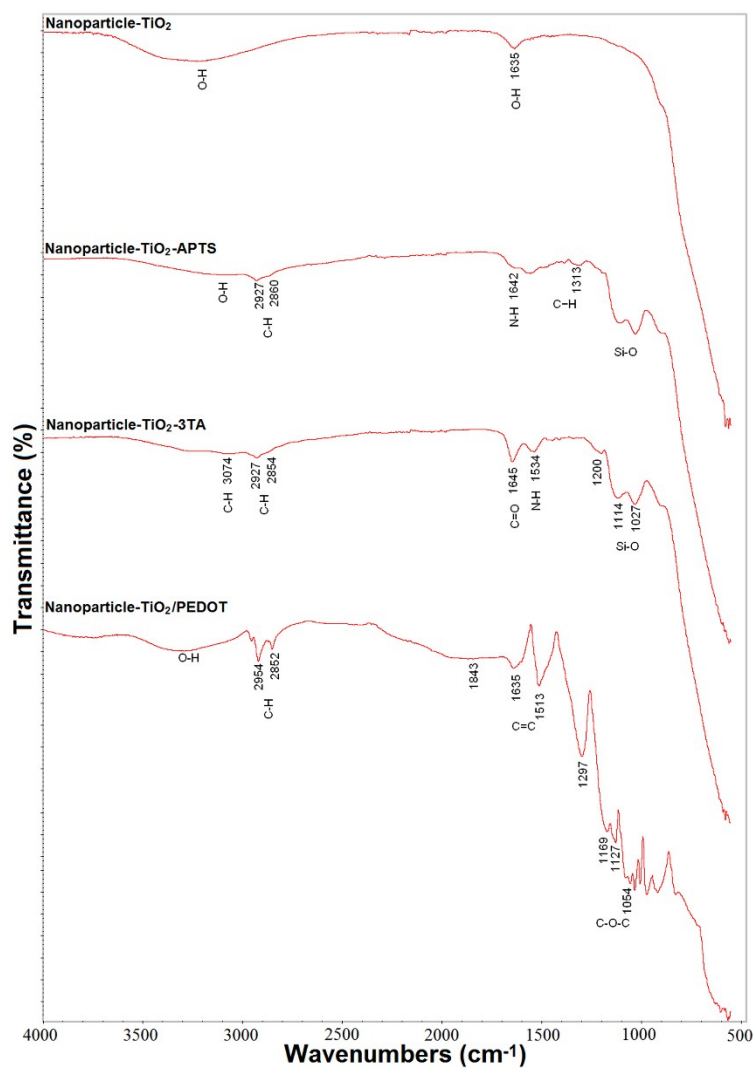

**Fig. S1** ATR-FTIR spectra of nanoparticle-TiO<sub>2</sub>, nanoparticle-TiO<sub>2</sub>-APTS, nanoparticle-TiO<sub>2</sub>-3TA and nanoparticle-TiO<sub>2</sub>/PEDOT.

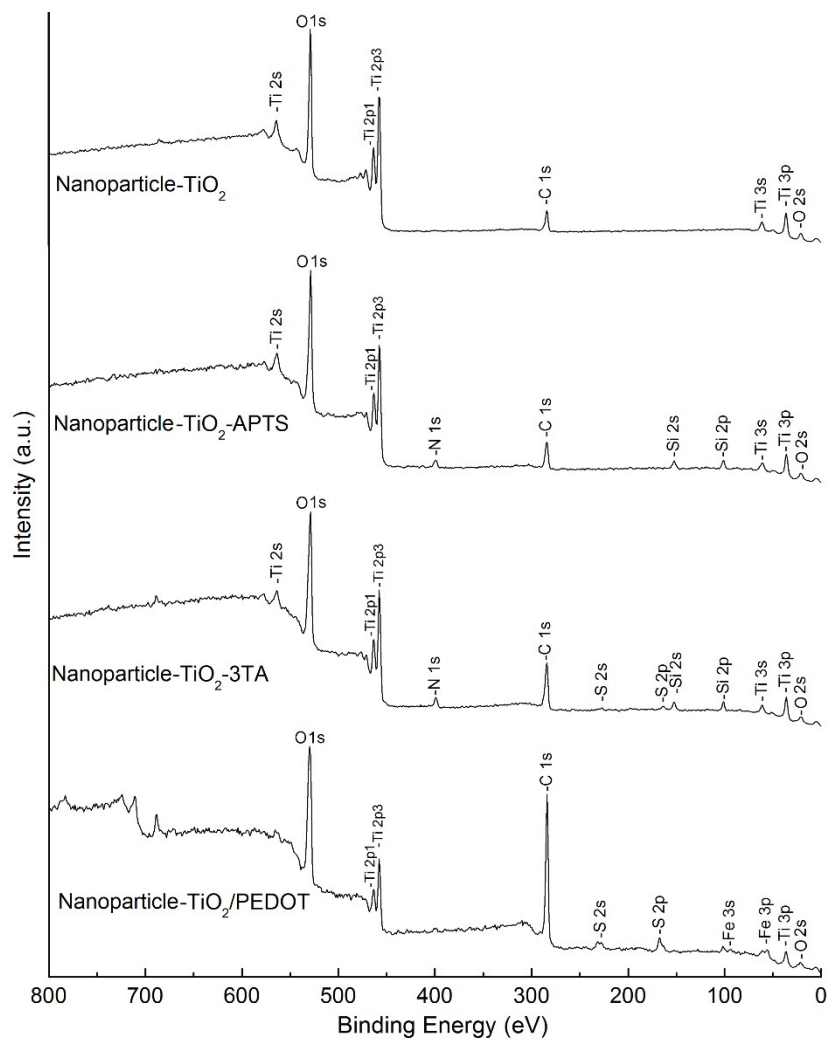

**Fig. S2** XPS survey-scan of nanoparticle-TiO<sub>2</sub>, nanoparticle-TiO<sub>2</sub>-APTS, nanoparticle-TiO<sub>2</sub>-3TA and nanoparticle-TiO<sub>2</sub>/PEDOT.

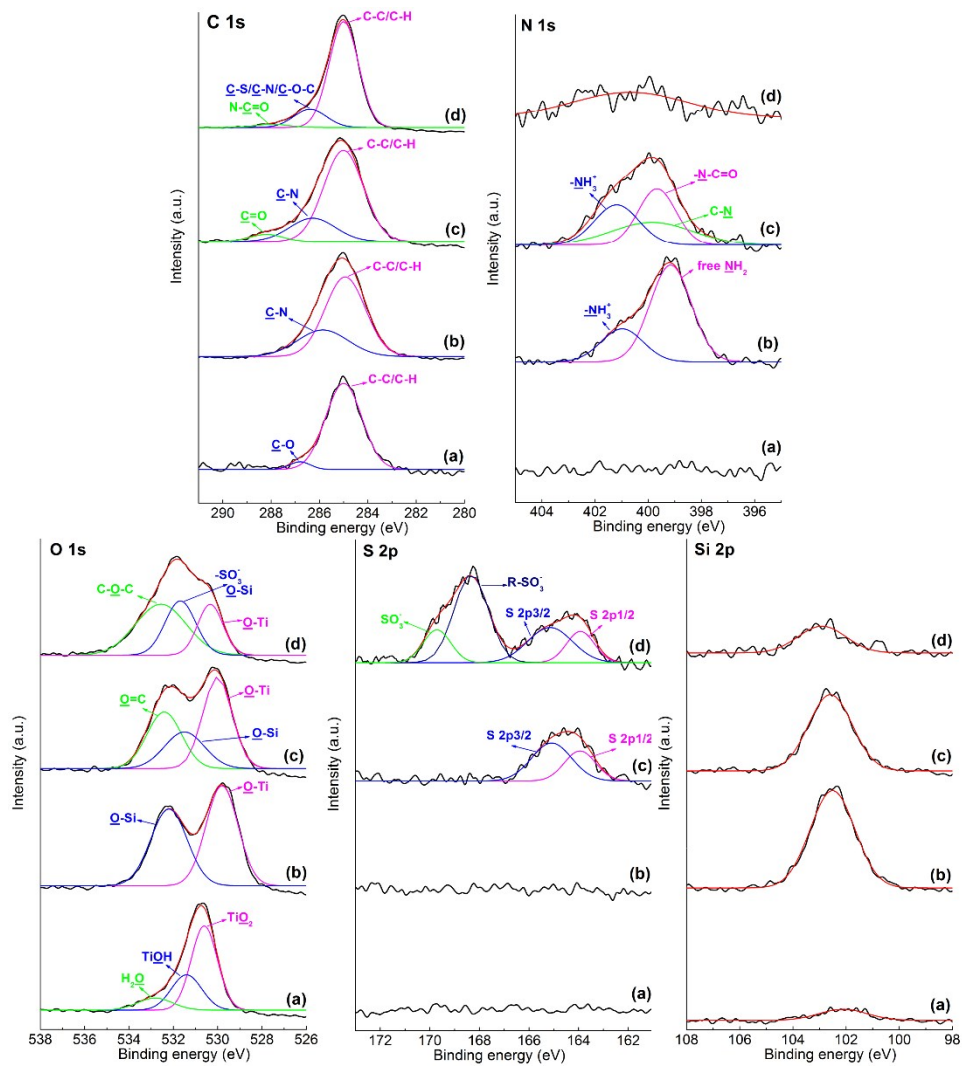

**Fig. S3** C 1s, O 1s, N 1s, Si 2p and S 2p core-level spectra of nanorod-TiO<sub>2</sub> (curve a), nanorod-TiO<sub>2</sub>-APTS (curve b), nanorod-TiO<sub>2</sub>-3TA (curve c) and nanorod-TiO<sub>2</sub>/PEDOT (curve d).

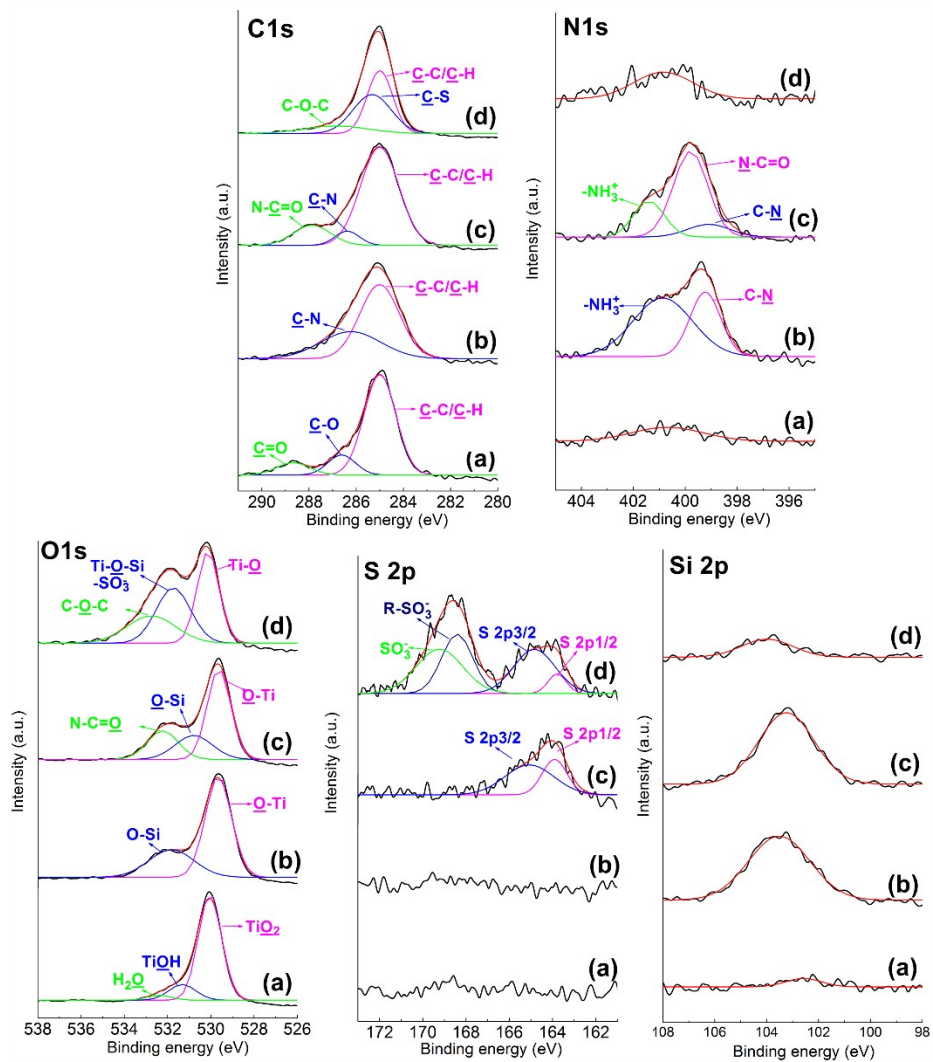

**Fig. S4** C 1s, O 1s, N 1s, Si 2p and S 2p core-level spectra of nanoparticle-TiO<sub>2</sub> (curve a), nanoparticle-TiO<sub>2</sub>-APTS (curve b), nanoparticle-TiO<sub>2</sub>-3TA (curve c) and nanoparticle-TiO<sub>2</sub>/PEDOT (curve d).

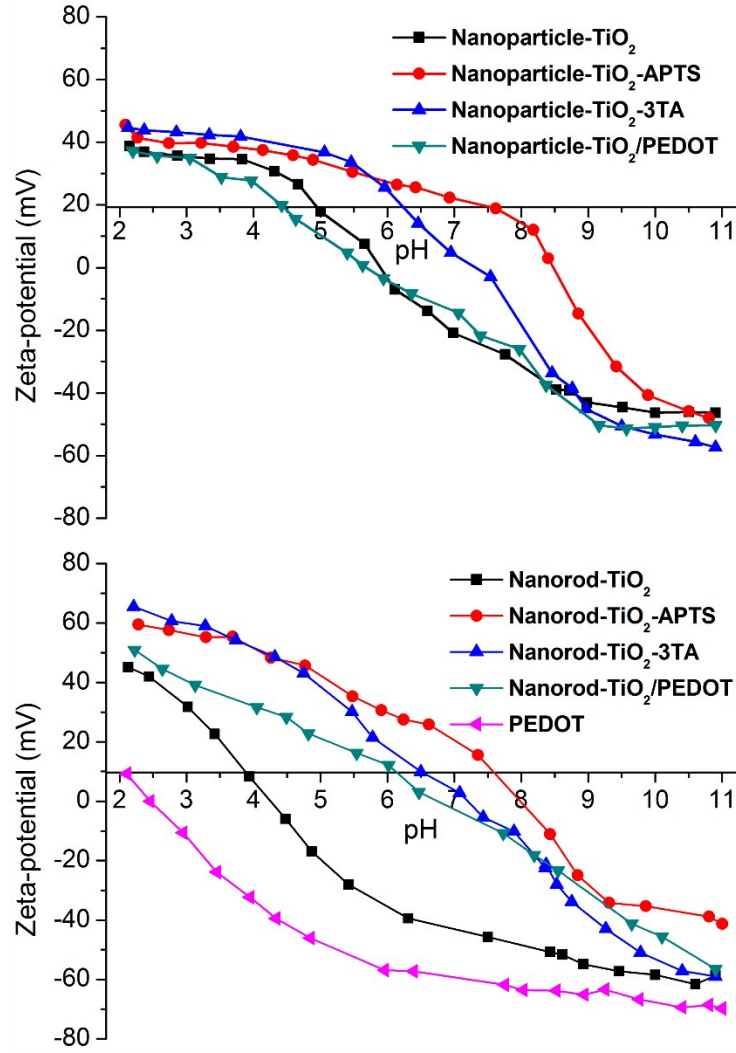

**Fig. S5** Change in  $\zeta$ -potential of the samples with pH.

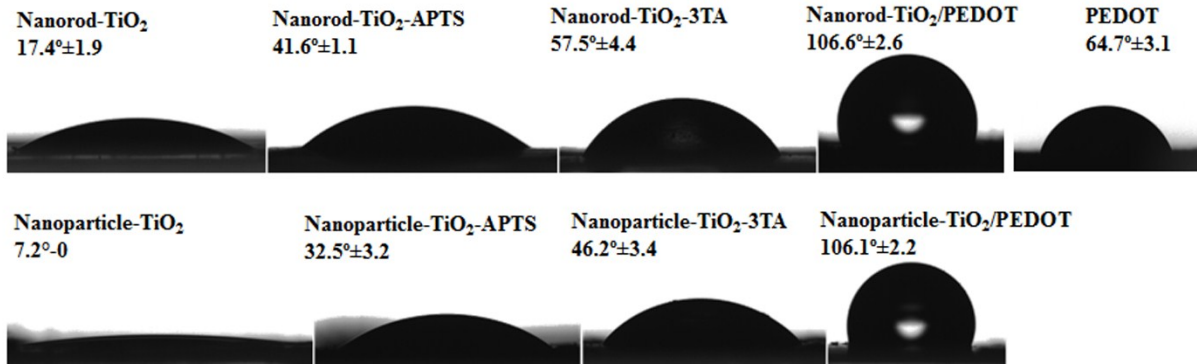

**Fig. S6** CA images and  $\theta$  values of the samples.

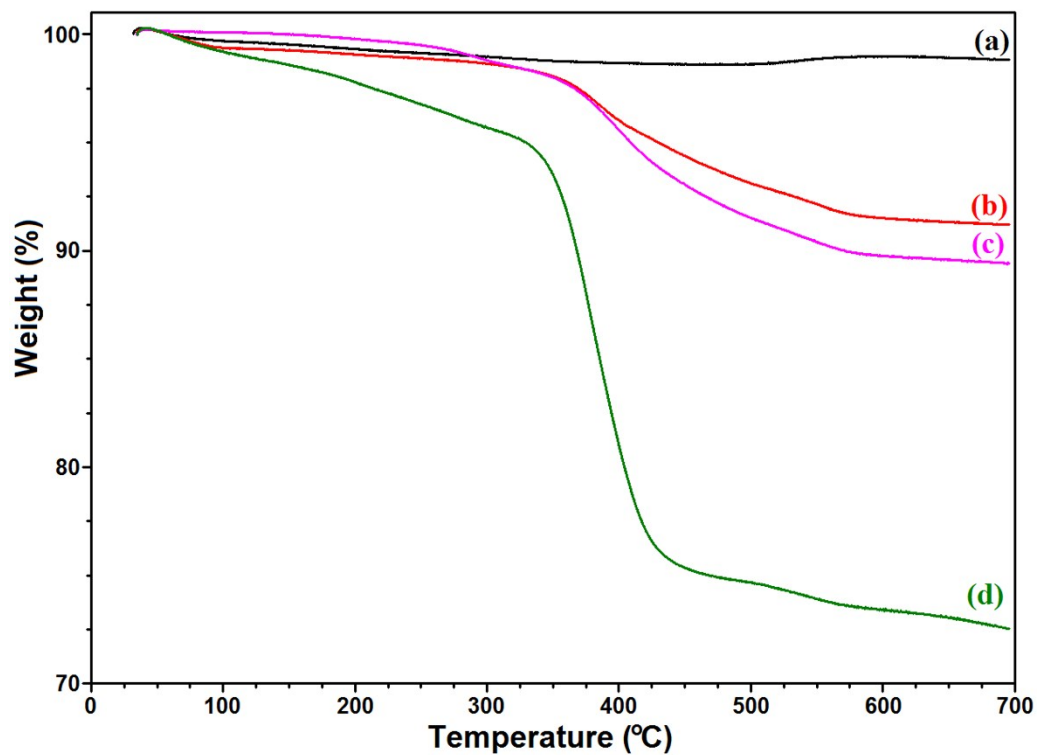

**Fig. S7** TGA curves of nanoparticle-TiO<sub>2</sub> (a), nanoparticle-TiO<sub>2</sub>-APTS (b), nanoparticle-TiO<sub>2</sub>-3TA (c) and nanoparticle-TiO<sub>2</sub>/PEDOT (d).
